# Supplementary material for: The antigen processing-associated transporter gene polymorphism: Role on gene and protein expression in HPV-infected pre-cancerous cervical lesion
Source: Front Cell Infect Microbiol. 2022 Dec 21;12:979800. doi: 10.3389/fcimb.2022.979800 (PMC9811671; doi:10.3389/fcimb.2022.979800)
Supplement: Supplementary file 2 [file Table_2.xlsx]

## Sheet: Planilha1
Table S1 - Conventional PCR and qPCR parameters for identification of polymorphisms and detection of gene expression levels.
Conventional PCR
Gene	SNPs	Primer sequence references	Fragment size	PCR reaction components (final volume of 20µl)	Temperature (°C)	Cycling
TAP1	rs1135216	Fang et al. (2017)	~335 pb	1x Tampão de PCR;	94°C → 5 minutes		Initial Denaturation
		TAP1-E10F: 5’-GCTCCTATGGCTTCTTC-3’		0,75 mM de MgCl2;	94°C → 1 minute	35 PCR cycles	Denaturation
		TAP1-E10R: 5’-GACTGCCTCACCTGTAA-3’		0,3 mM de dNTPs;	58°C → 1 minute		Annealing
				0,5 μM TAP1-E10F;	72°C → 1 minute		Extension
				0,5 μM TAP1-E10R;	72°C → 7 minutes		Final Extension
				0,05 U de Taq DNA Polymerase	4ºC → indefinitely		Hold
TAP2	rs1800454	This article	~860 pb	1x Tampão de PCR;	94°C → 10 minutes		Initial Denaturation
		TAP2-E5,6F: 5'- GTA GAC TAG GGA GCA TCT CAC -3'		1,5 mM de MgCl2;	94°C → 1 minute	40 PCR cycles	Denaturation
		TAP2- E5,6R: 5'- CAG AAT AAT ATG GGT GGG GGG -3'		0,2 mM de dNTPs;	64°C → 1 minute		Annealing
				DMSO de 2%;	72°C → 1 minute and 20 seconds		Extension
				0,5 μM TAP2-E5,6F;	72°C → 7 minutes		Final Extension
				0,5 μM TAP2-E5,6R;	4ºC → indefinitely		Hold
				1,875 U de AmpliTaq Gold DNA Polymerase
TAP2	rs2228396	This article	~1460 pb	1x Tampão de PCR;	94°C → 10 minutes		Initial Denaturation
	rs4148876	TAP2-E9,12F: 5'-CGC ACC AGG TGT TCA TTC TG-3'		1,0 mM de MgCl2;	94°C → 1 minute	40 PCR cycles	Denaturation
	rs241447	TAP2-E9,12R: 5'-ATC TCC ATC GTG CCT GCA AC-3'		0,2 mM de dNTPs;	64°C → 1 minute		Annealing
				DMSO de 2%;	72°C → 1 minute and 20 seconds		Extension
				0,5 μM TAP2-E9,12F;	72°C → 7 minutes		Final Extension
				0,5 μM TAP2-E9,12R;	4ºC → indefinitely		Hold
				2,5 U de AmpliTaq Gold DNA Polymerase
Real-time PCR
RNAm		Primer sequence references	Fragment size	qPCR reaction components (final volume of 20µl)	Temperature (°C)		Cycling
TAP1		This article	~156 pb	7.8 µL nuclease-free water	95°C → 10 minutes		Hold
		TAP1-(E9,11)F: 5'- TAT GAC ACA GAG GTA GAC GAG -3'		10 µL 2× Power SYBR® Green PCR Master Mix	95°C → 15 seconds	40 PCR cycles	Denaturation
		TAP1-(E9,11)R: 5'- CTG CTC CAC CTG TAA CTG GCT -3'		0.6 μl forward PCR primers (300nM)	60°C → 1 minute		Annealing/extension
				0.6 μl reverse PCR primers (300nM)
				1 μl cDNA
TAP2		This article	~149 pb	7,0 µL nuclease-free water	94 ºC → 10 minutes		Hold
		TAP2-(E5,7)F: 5'- TAA GGA GGG TGC TGC ACT TGG -3'		10 µL 2× Power SYBR® Green PCR Master Mix	95 ºC → 15 seconds	40 PCR cycles	Denaturation
		TAP2-(E5,7)R: 5'- GTA TAC CAG GGT CTG CAC ATA -3'		1 μl forward PCR primers (500nM)	60 ºC → 1 minute		Annealing/extension
				1 μl reverse PCR primers (500nM)
				1 μl cDNA
GAPDH		Marques et al (2011).		7,0 µL nuclease-free water	94 ºC → 10 minutes		Hold
		GAPDH2F: 5’-AGA AGG CTG GGG CTC ATT TG-3’	~210pb	10 µL 2× Power SYBR® Green PCR Master Mix	95 ºC → 15 seconds	40 PCR cycles	Denaturation
		GAPDH2R: 5’-GTG GTC ATG AGT CCT TCC AC-3’		1 μl forward PCR primers (500nM)	60 ºC → 1 minute		Annealing/extension
				1 μl reverse PCR primers (500nM)
				1 μl cDNA
Taq DNA Polymerase (Invitrogen, California – USA); AmpliTaq Gold DNA Polymerase and Power SYBR® Green PCR Master Mix (Applied Biosystems™)
